# Supplementary material for: Molecular evolution of the keratin associated protein gene family in mammals, role in the evolution of mammalian hair
Source: PubMed Central journal article supplement (PMC2528016; doi:10.1186/1471-2148-8-241), 2008-08-23

Figure 1

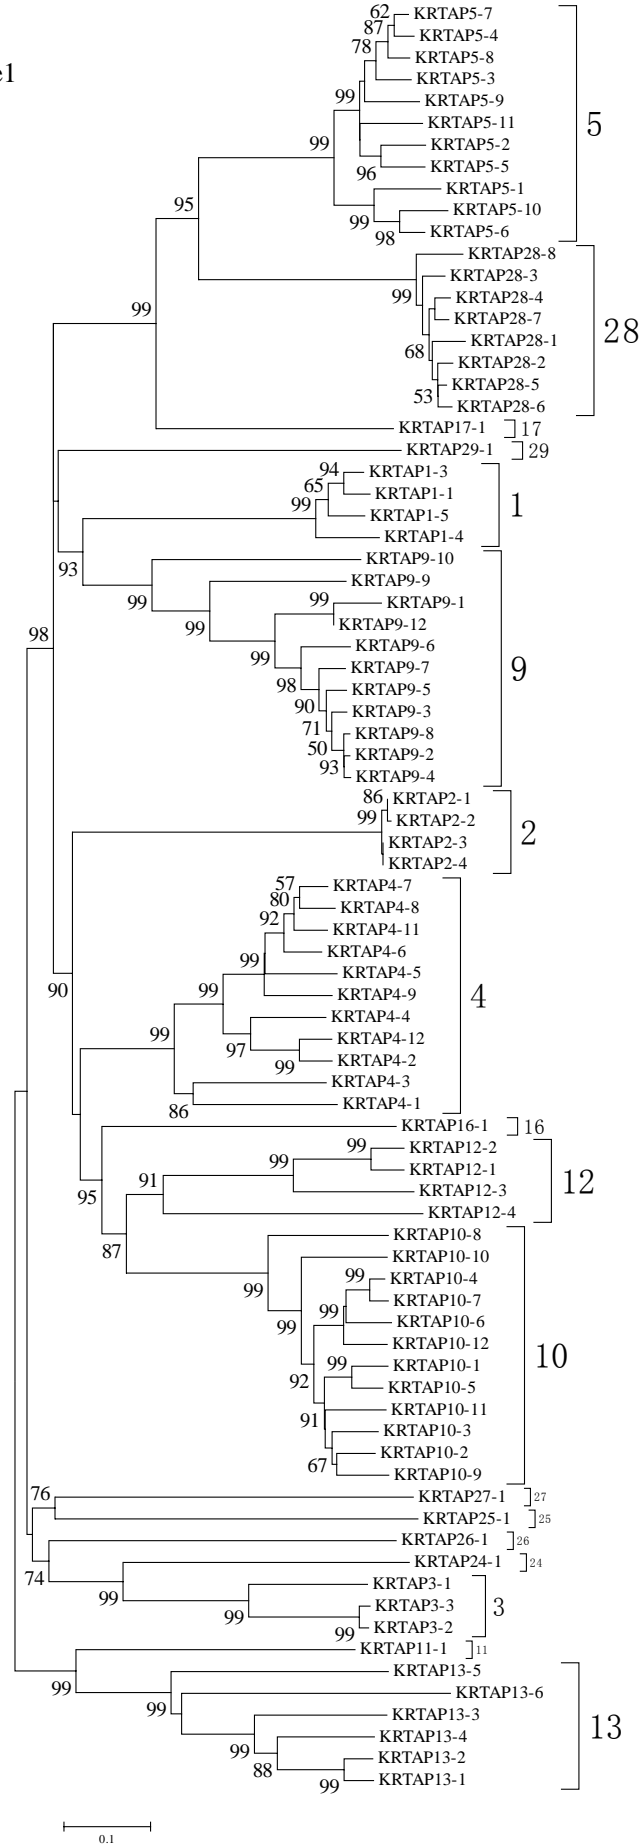

Figure2

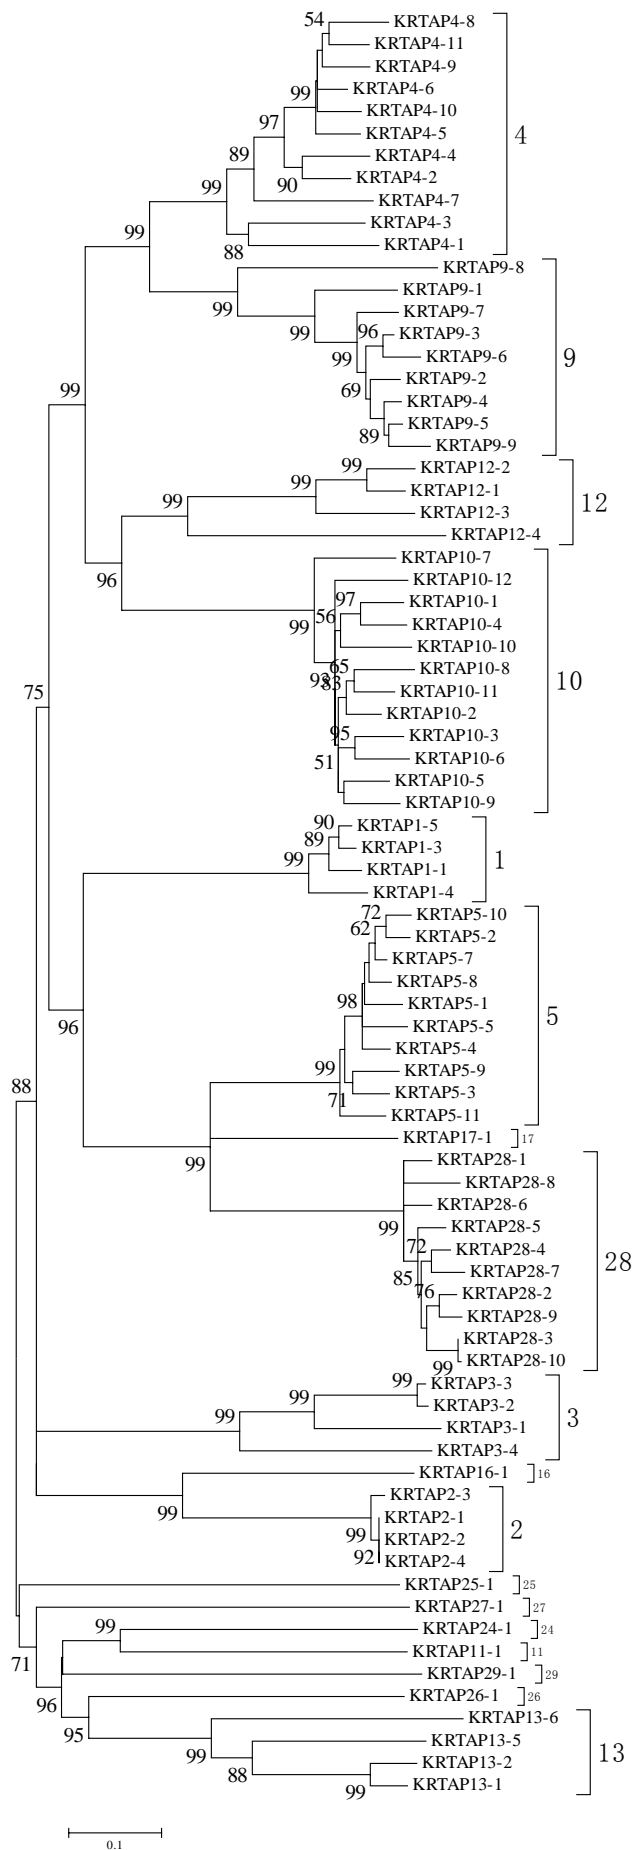

Figure3

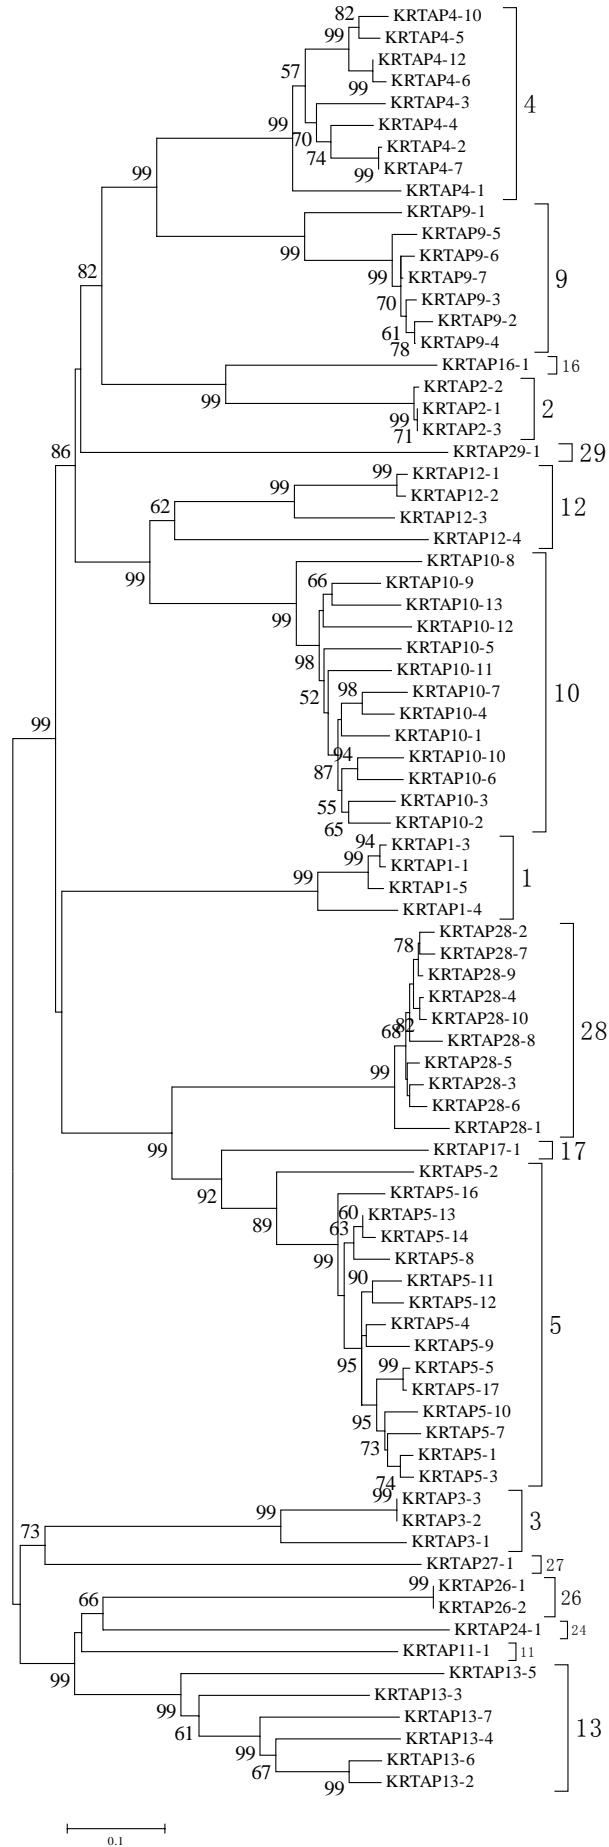

Figure 4

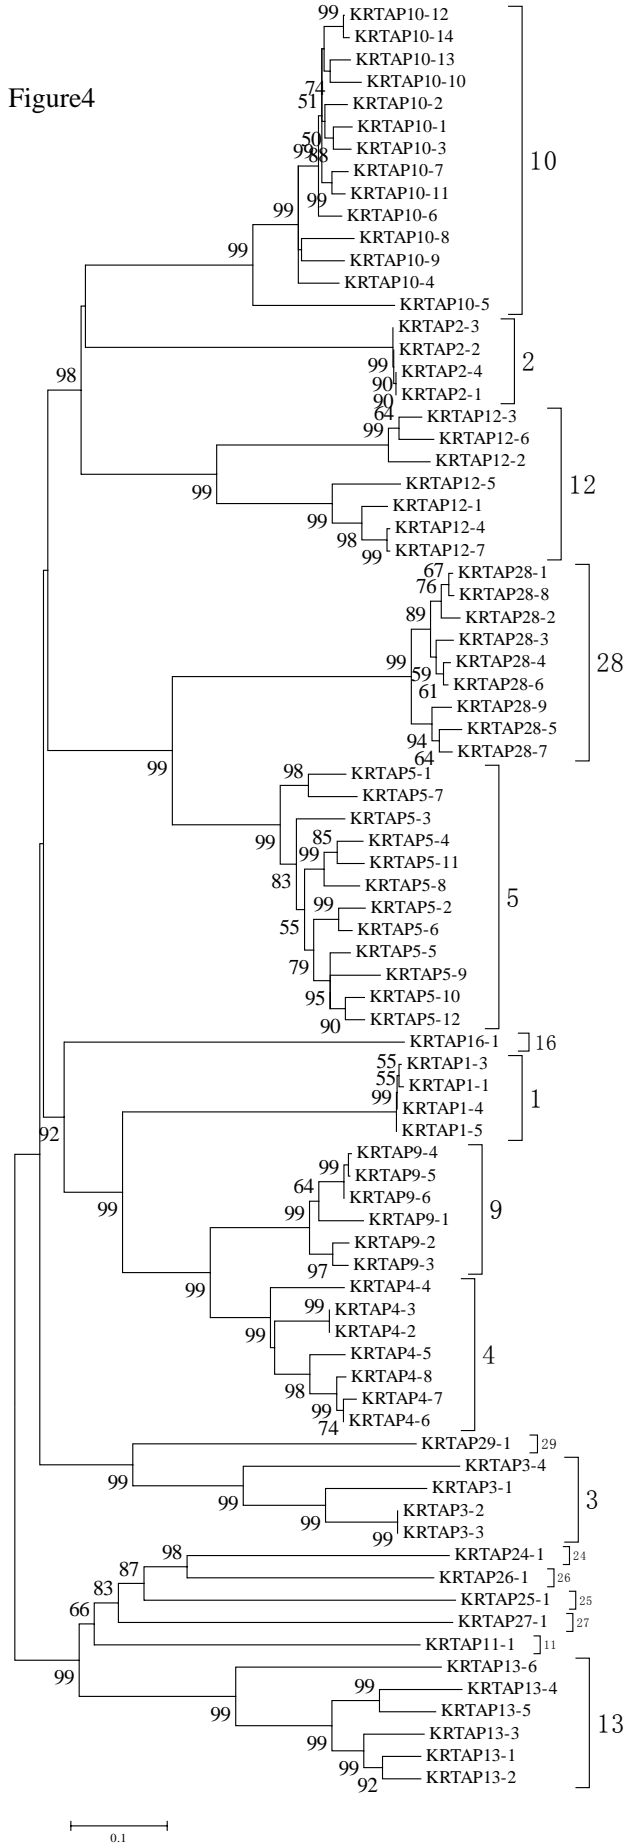

Figure 5

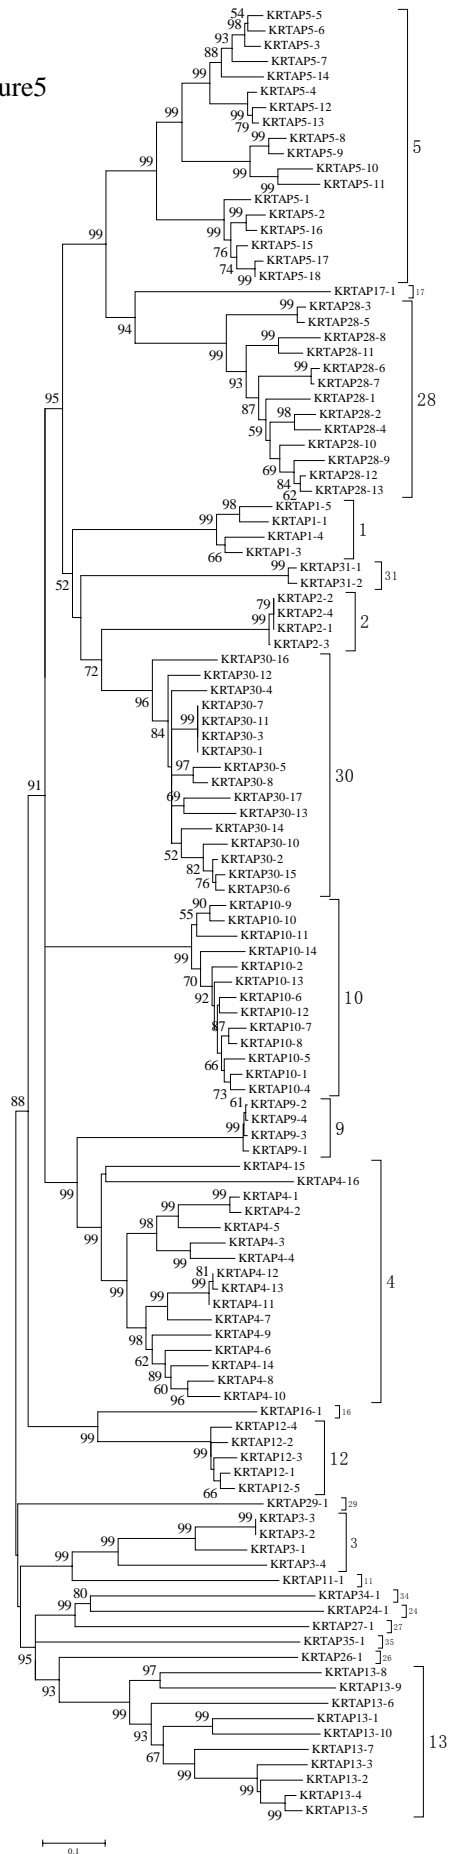

Figure 6

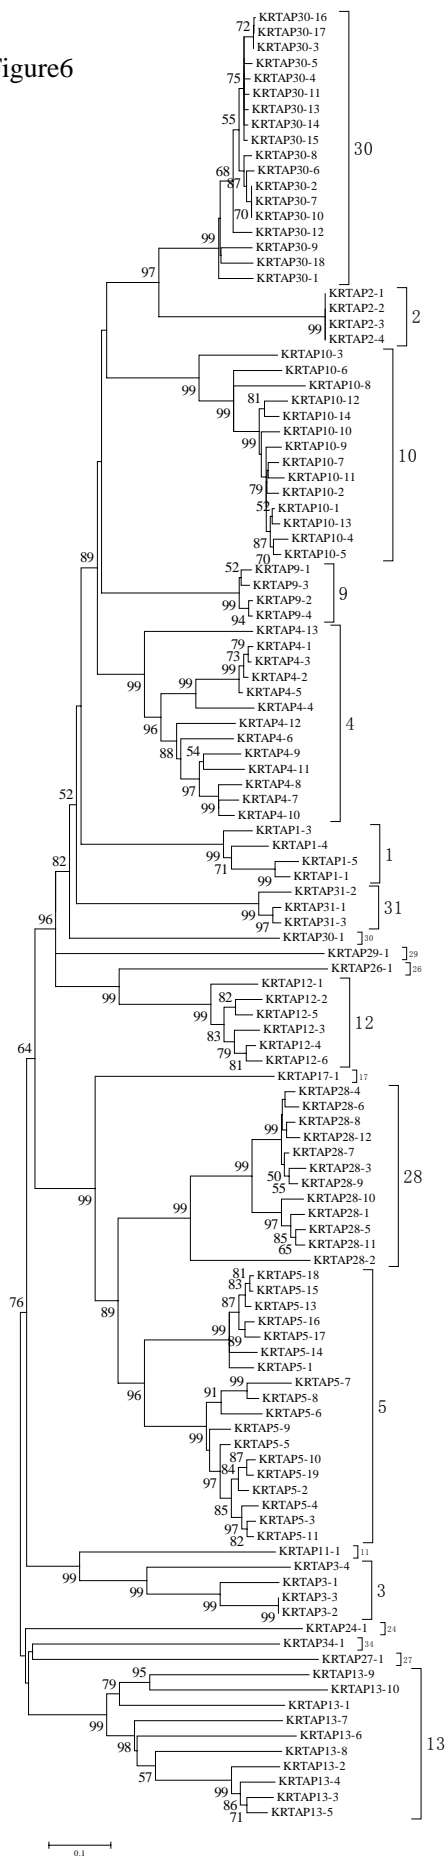

Figure 7

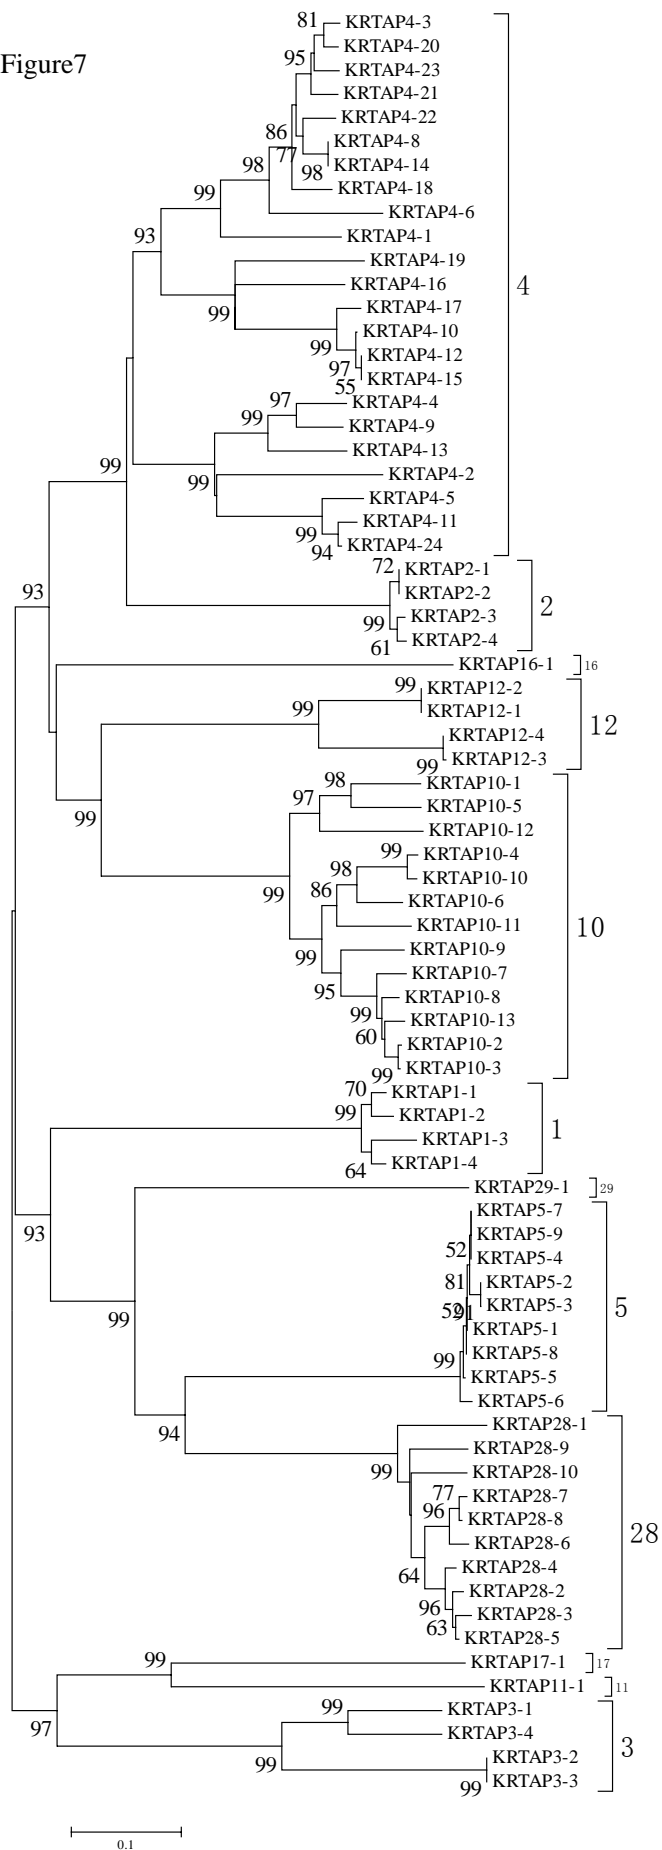

Figure8

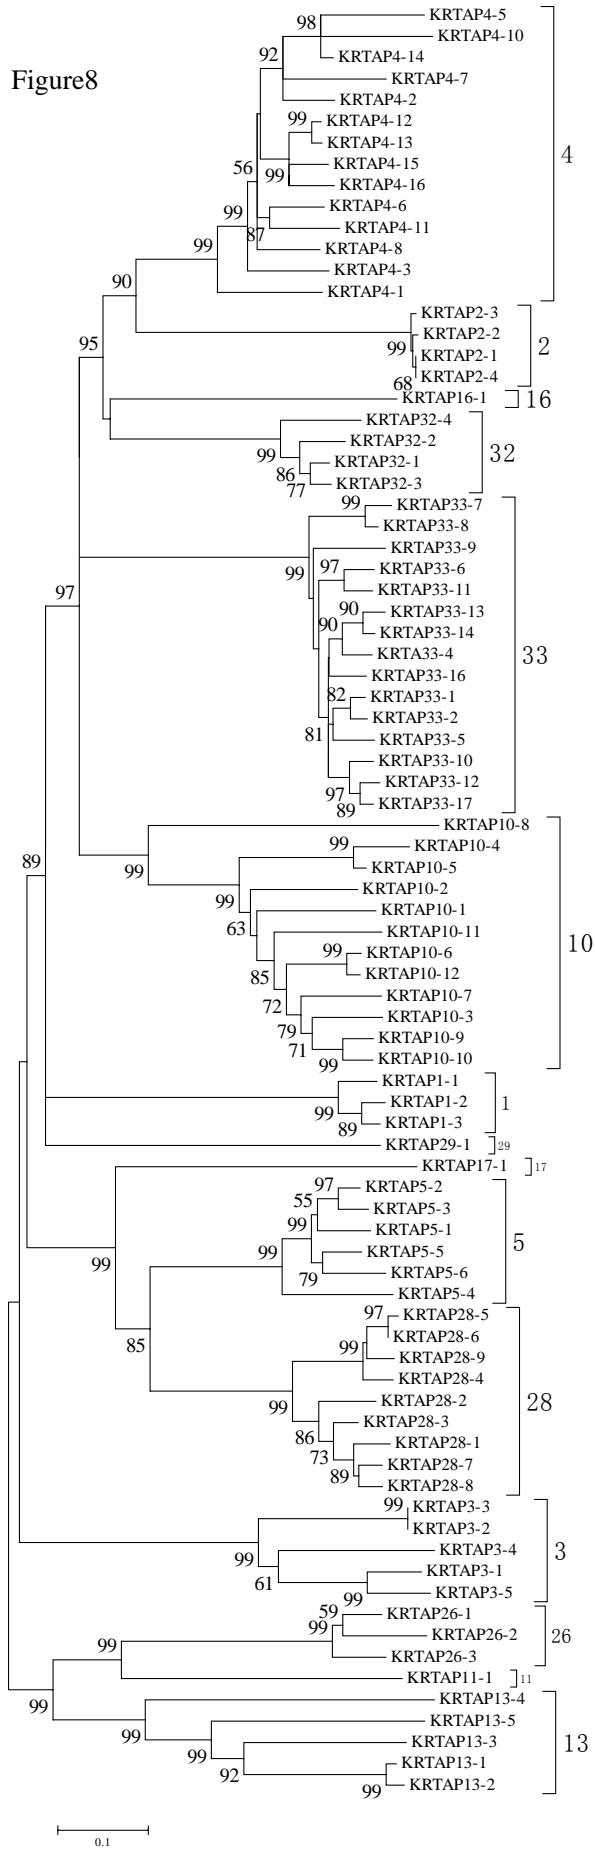



Figure9

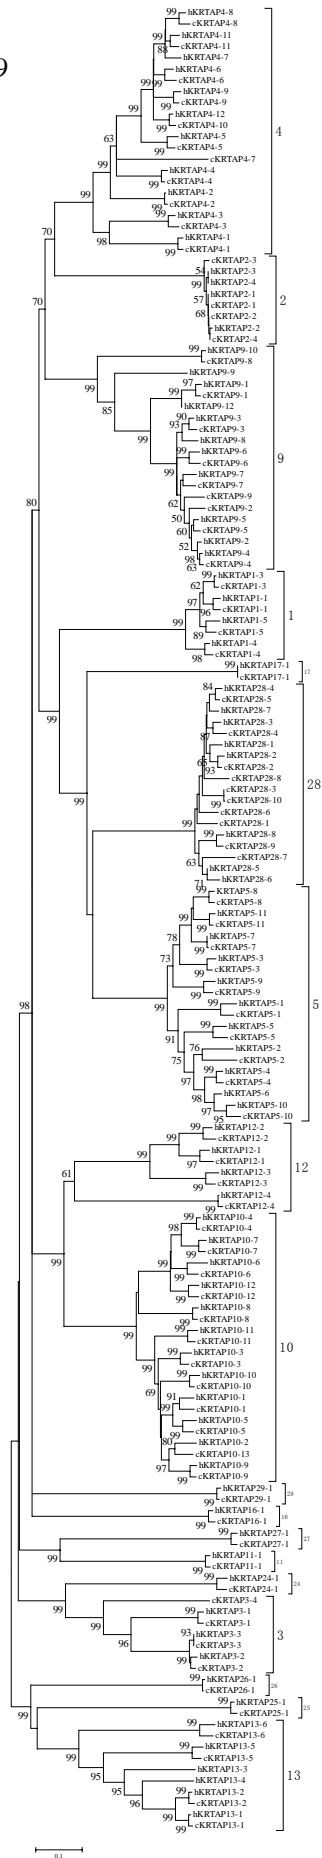

Figure 10

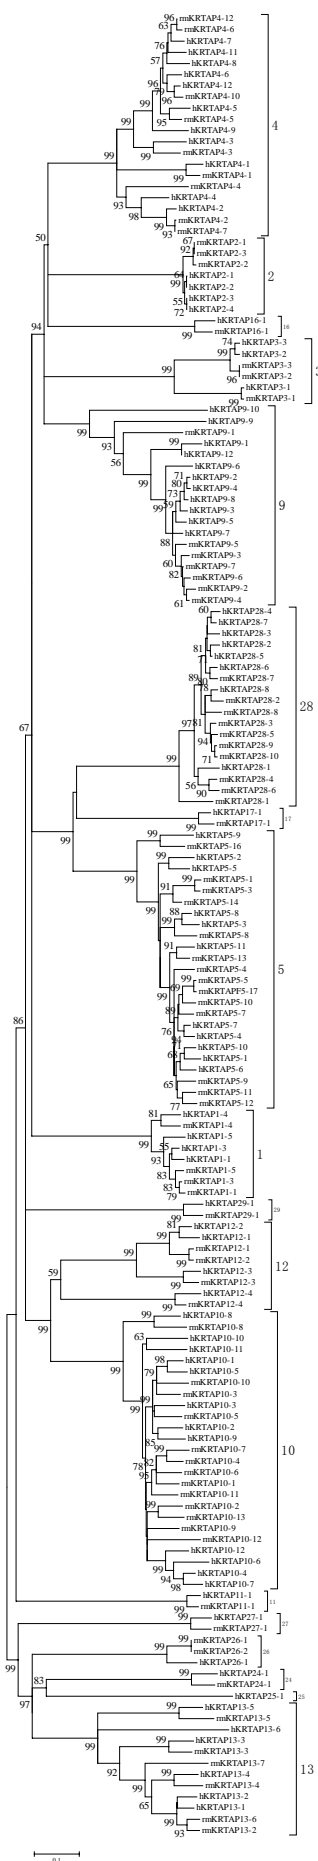

Figure 11

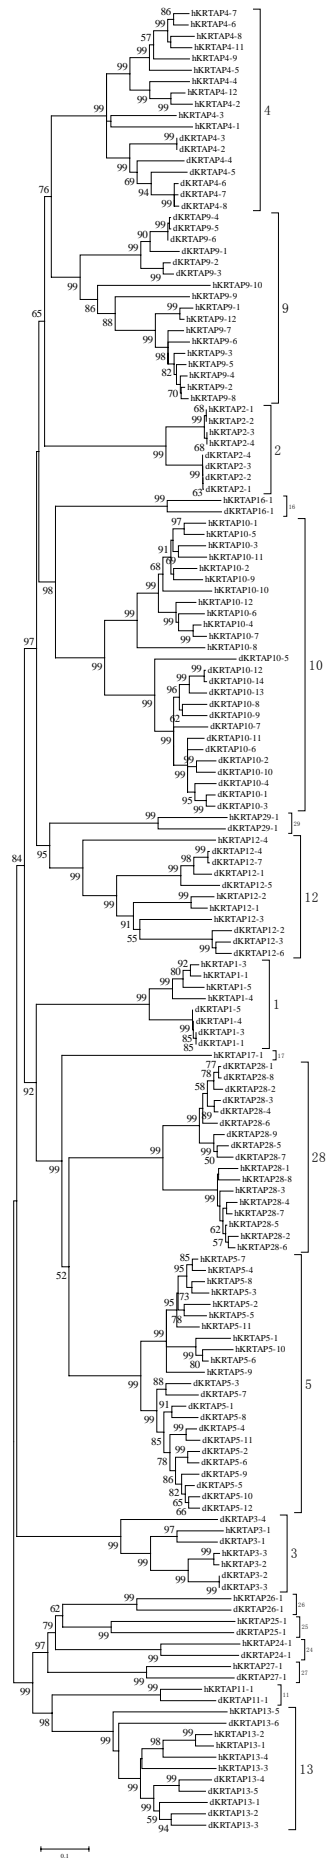



Figure 13

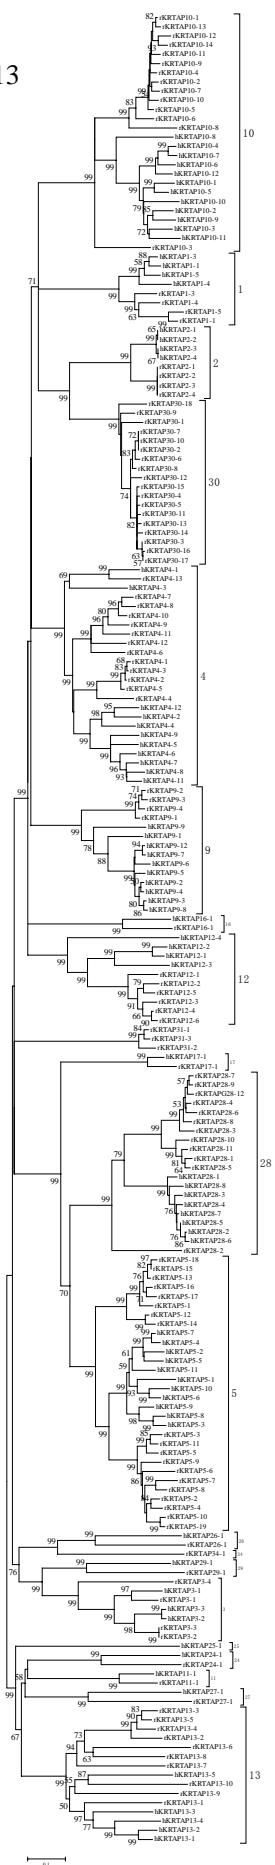



Figure15

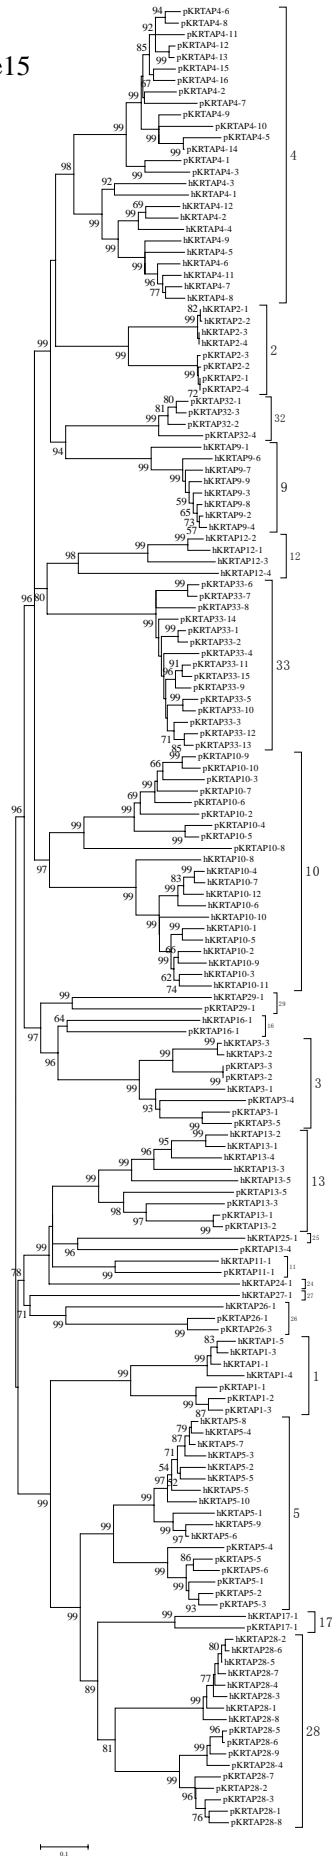

Figure 16

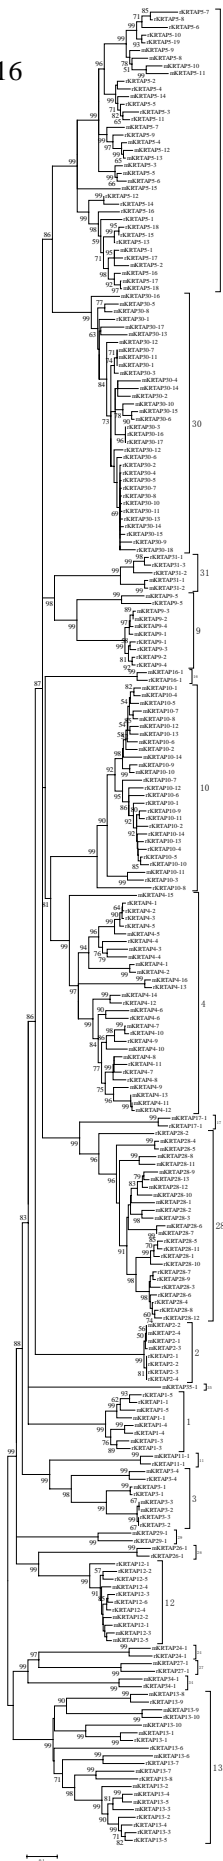



Figure 17

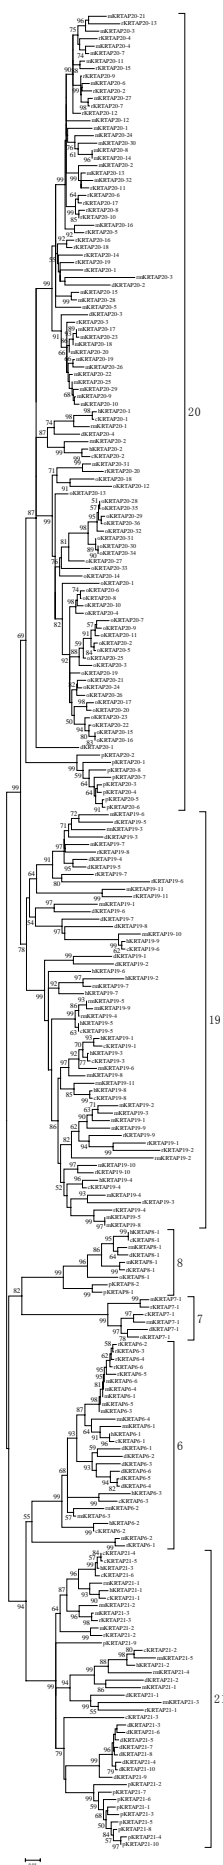

Supplement: 1471-2148-8-241-S2.pdf [file 1471-2148-8-241-S2.pdf]
